# Supplementary material for: Genetic Characterization of Goutanap Virus, a Novel Virus Related to Negeviruses, Cileviruses and Higreviruses
Source: PubMed Central journal article supplement (PMC4246226; doi:10.3390/v6114346), 2014-11-12
Supplement: viruses-06-04346-s001.pdf [file viruses-06-04346-s001.pdf]

## Supplementary Material

### Genetic Characterization of Goutanap Virus, a Novel Virus Related to Negevirus, Cileviruses and Higreviruses

René Kallies, Anne Kopp, Florian Zirkel, Alejandro Estrada, Thomas R. Gillespie, Christian Drosten and Sandra Junglen

**Table S1.** Viruses used in the phylogenetic analyses.

| Family/Genus                       | Virus Species                        | Abbreviation | Strain        | Accession Number |
|------------------------------------|--------------------------------------|--------------|---------------|------------------|
| Unclassified/<br>unclassified      | Dezidougou virus                     | DEZV         | ArA 20086     | JQ675604         |
|                                    |                                      |              | 3940-83       | JQ675610         |
|                                    | Loreto virus                         | LORV         | Pe AR 2612/77 | JQ675611         |
|                                    |                                      |              | Pe AR 2617/77 | JQ675612         |
|                                    |                                      |              | EO-329        | JQ675605         |
|                                    | Negev virus                          | NEGV         | M30957        | JQ675608         |
|                                    |                                      |              | M33056        | JQ675609         |
|                                    | Ngewotan virus                       | NWTV         |               | JQ686833         |
|                                    | Piura virus                          | PIUV         |               | JQ675607         |
|                                    |                                      |              |               | JQ675606         |
|                                    | Santana virus                        | SANV         |               |                  |
|                                    |                                      |              |               |                  |
|                                    |                                      |              |               |                  |
|                                    |                                      |              |               |                  |
|                                    | Tanay virus                          | TANAV        | 11-2          | NC_024071        |
|                                    |                                      |              | 11-3          | KF425262         |
|                                    |                                      |              | 11-4          | KF425263         |
|                                    |                                      |              | 11-5          | KF425264         |
|                                    | Wallerfield virus                    | WALV         |               | NC_023440        |
|                                    | Blueberry necrotic ring blotch virus | BNRBV        |               | NC_016084        |
|                                    |                                      |              |               | NC_016085        |
| Unclassified/<br><i>Cilevirus</i>  | Citrus leprosis virus C              | CiCLV        |               | DQ352194         |
|                                    |                                      | CiCLV        |               | DQ157466         |
|                                    |                                      | CiCLV        |               | DQ388512         |
| Unclassified/<br><i>Higrevirus</i> | Hibiscus green spot virus            | HGSV         |               | NC_016141        |
| <i>Virgaviridae/<br/>Furovirus</i> | Oat golden stripe virus              | OGSV         |               | NC_002358        |
|                                    | Soil-borne cereal mosaic virus       | SBCMV        |               | NC_002351        |
|                                    | Soil-borne wheat mosaic virus        | SBWMV        |               | NC_002351        |
| <i>Hordaivirus</i>                 | Barley stripe mosaic virus           | BSMV         |               | NC_003469        |
| <i>Peculivirus</i>                 | Peanut clump virus                   | PCV          |               | NC_003672        |
|                                    | Indian peanut clump virus            | IPCV         |               | NC_004729        |
| <i>Pomovirus</i>                   | Beet soil-borne virus                | BSBV         |               | NC_003520        |
|                                    | Beet virus Q                         | BVQ          |               | NC_003510        |
|                                    | Potato mop-top virus                 | PMTV         |               | NC_003723        |
| <i>Tobamovirus</i>                 | Cucumber green mottle mosaic virus   | CGMMV        |               | NC_001801        |
|                                    | Odontoglossum ringspot virus         | ORSV         |               | NC_001728        |
|                                    | Tobacco mosaic virus                 | TMV          |               | NC_001367        |
| <i>Tobravirus</i>                  | Pepper ringspot virus                | PepRSV       |               | NC_003669        |
|                                    | Pea early browning virus             | PEBV         |               | NC_002036        |
|                                    | Tobacco rattle virus                 | TRV          |               | NC_003805        |
